# Supplementary material for: Transcriptome and Metabolome Analyses Reveal an Insight of Chlorophyll, Photosynthesis, Metal Ion and Phenylpropanoids Related Pathways in Sugarcane Ratoon Chlorosis
Source: Research Square preprint supplement (doi:10.21203/rs.3.rs-1194932/v1), 2021-12-28
Supplement: Supplementary file 1 [file c4f028232e3a6668a70f78d0.xls]

## Sheet: chlorophyll metabolism
id	Control-1_count	Control-2_count	Control-3_count	Control-4_count	Control-5_count	Chlorosis-1_count	Chlorosis-2_count	Chlorosis-3_count	Chlorosis-4_count	Chlorosis-5_count	Control-1_fpkm	Control-2_fpkm	Control-3_fpkm	Control-4_fpkm	Control-5_fpkm	Chlorosis-1_fpkm	Chlorosis-2_fpkm	Chlorosis-3_fpkm	Chlorosis-4_fpkm	Chlorosis-5_fpkm	Control_mean	Chlorosis_mean	log2(fc)	PValue	FDR	Symbol	KEGG_A_class	KEGG_B_class	K_ID	Description	Pathway	GO Component	GO Function	GO Process
Unigene0088192	39245	32278	27393	65434	36874	11303	13005	16789	14207	11385	987.32	897.89	798.98	1459.82	830.79	303.36	293.75	379.32	333.28	271.16	994.96	316.174	-1.65392	1.79e-16	1.16e-14	PORB	Metabolism;Metabolism;Metabolism	Global and overview maps;Global and overview maps;Metabolism of cofactors and vitamins	K00218;K00218;K00218	protochlorophyllide reductase B [Zea mays]	ko01100//Metabolic pathways;ko01110//Biosynthesis of secondary metabolites;ko00860//Porphyrin and chlorophyll metabolism	GO:0009536//plastid	GO:0016628//oxidoreductase activity, acting on the CH-CH group of donors, NAD or NADP as acceptor	GO:0006779//porphyrin-containing compound biosynthetic process;GO:0044710//single-organism metabolic process
Unigene0085714	49289	42210	38592	48475	51265	14849	15296	20774	25881	14209	1184.7	1121.8	1075.42	1033.23	1103.5	380.76	330.08	448.42	580.06	323.33	1103.73	412.53	-1.41982	6.34e-21	6.54e-19	CRD1	Metabolism;Metabolism;Metabolism	Global and overview maps;Global and overview maps;Metabolism of cofactors and vitamins	K04035;K04035;K04035	leucine zipper protein [Saccharum hybrid cultivar R570]	ko01100//Metabolic pathways;ko01110//Biosynthesis of secondary metabolites;ko00860//Porphyrin and chlorophyll metabolism	-	GO:0016709//oxidoreductase activity, acting on paired donors, with incorporation or reduction of molecular oxygen, NAD(P)H as one donor, and incorporation of one atom of oxygen;GO:0043169//cation binding	GO:0006779//porphyrin-containing compound biosynthetic process;GO:0044710//single-organism metabolic process
Unigene0060683	12	19	17	5	32	2	1	4	3	3	0.78	1.37	1.29	0.29	1.87	0.14	0.06	0.23	0.18	0.19	1.12	0.16	-2.80735	4.67e-06	5.12e-05	CHLH	Metabolism;Metabolism;Metabolism	Global and overview maps;Global and overview maps;Metabolism of cofactors and vitamins	K03403;K03403;K03403	Magnesium-chelatase subunit ChlH, chloroplastic [Dichanthelium oligosanthes]	ko01100//Metabolic pathways;ko01110//Biosynthesis of secondary metabolites;ko00860//Porphyrin and chlorophyll metabolism	-	-	-
Unigene0060682	127364	158230	122291	247159	183137	25883	33967	44037	44919	34316	1495.39	2054.18	1664.65	2573.39	1925.65	324.2	358.06	464.33	491.78	381.44	1942.65	403.962	-2.26574	2.01e-29	4.22e-27	CHLH	Metabolism;Metabolism;Metabolism	Global and overview maps;Global and overview maps;Metabolism of cofactors and vitamins	K03403;K03403;K03403	Magnesium-chelatase subunit ChlH chloroplastic [Zea mays]	ko01100//Metabolic pathways;ko01110//Biosynthesis of secondary metabolites;ko00860//Porphyrin and chlorophyll metabolism	GO:0009532//plastid stroma;GO:0042170//plastid membrane	GO:0032550//purine ribonucleoside binding;GO:0051003//ligase activity, forming nitrogen-metal bonds, forming coordination complexes	GO:0006779//porphyrin-containing compound biosynthetic process
Unigene0060531	1	0	0	0	0	0	9	1	10	6	0.08	0	0	0	0	0	0.64	0.07	0.74	0.45	0.016	0.38	4.56986	0.00715613	0.02855	CLH2	Metabolism;Metabolism;Metabolism	Global and overview maps;Global and overview maps;Metabolism of cofactors and vitamins	K08099;K08099;K08099	PREDICTED: chlorophyllase-2, chloroplastic-like [Zea mays]	ko01100//Metabolic pathways;ko01110//Biosynthesis of secondary metabolites;ko00860//Porphyrin and chlorophyll metabolism	-	-	-
Unigene0052390	832	511	626	780	731	1691	1907	1525	1445	1510	15.16	10.29	13.22	12.6	11.93	32.86	31.19	24.95	24.54	26.04	12.64	27.916	1.1431	3.71e-11	1.17e-09	CHLG	Metabolism;Metabolism;Metabolism	Global and overview maps;Global and overview maps;Metabolism of cofactors and vitamins	K04040;K04040;K04040	Chlorophyll synthase, chloroplastic [Dichanthelium oligosanthes]	ko01100//Metabolic pathways;ko01110//Biosynthesis of secondary metabolites;ko00860//Porphyrin and chlorophyll metabolism	GO:0031224//intrinsic component of membrane;GO:0031976//plastid thylakoid;GO:0042170//plastid membrane	GO:0004659//prenyltransferase activity	GO:0000097//sulfur amino acid biosynthetic process;GO:0006090//pyruvate metabolic process;GO:0006355//regulation of transcription, DNA-templated;GO:0006739//NADP metabolic process;GO:0006779//porphyrin-containing compound biosynthetic process;GO:0009658//chloroplast organization;GO:0009668//plastid membrane organization;GO:0009887//organ morphogenesis;GO:0016072//rRNA metabolic process;GO:0016109…
Unigene0047877	642	851	697	557	883	95	87	95	92	89	17.24	25.27	21.7	13.26	21.24	2.72	2.1	2.29	2.3	2.26	19.742	2.334	-3.08039	6.87e-65	7.14e-62	NYC1	Metabolism;Metabolism;Metabolism	Global and overview maps;Global and overview maps;Metabolism of cofactors and vitamins	K13606;K13606;K13606	PREDICTED: probable chlorophyll(ide) b reductase NYC1, chloroplastic [Setaria italica]	ko01100//Metabolic pathways;ko01110//Biosynthesis of secondary metabolites;ko00860//Porphyrin and chlorophyll metabolism	-	-	-
Unigene0031236	25	14	16	21	29	0	0	0	2	0	1.9	1.17	1.41	1.41	1.97	0	0	0	0.14	0	1.572	0.028	-5.81103	2.62e-09	5.86e-08	HEMA1	Metabolism;Metabolism;Metabolism	Global and overview maps;Global and overview maps;Metabolism of cofactors and vitamins	K02492;K02492;K02492	PREDICTED: glutamyl-tRNA reductase 2 [Setaria italica]	ko01100//Metabolic pathways;ko01110//Biosynthesis of secondary metabolites;ko00860//Porphyrin and chlorophyll metabolism	-	GO:0016491//oxidoreductase activity	GO:0033014//tetrapyrrole biosynthetic process;GO:0044710//single-organism metabolic process
Unigene0031235	1146	1175	1040	1885	1279	16	17	15	28	5	108.79	123.34	114.47	158.69	108.74	1.62	1.45	1.28	2.48	0.45	122.806	1.456	-6.39823	7.91e-102	1.92e-98	HEMA1	Metabolism;Metabolism;Metabolism	Global and overview maps;Global and overview maps;Metabolism of cofactors and vitamins	K02492;K02492;K02492	Glutamyl-tRNA reductase 1 chloroplastic [Zea mays]	ko01100//Metabolic pathways;ko01110//Biosynthesis of secondary metabolites;ko00860//Porphyrin and chlorophyll metabolism	-	GO:0000166//nucleotide binding;GO:0016620//oxidoreductase activity, acting on the aldehyde or oxo group of donors, NAD or NADP as acceptor	GO:0006779//porphyrin-containing compound biosynthetic process;GO:0044710//single-organism metabolic process
Unigene0027761	23	8	11	5	9	3	4	2	2	7	1.82	0.7	1.01	0.35	0.64	0.25	0.28	0.14	0.15	0.52	0.904	0.268	-1.75409	0.0037856	0.0169023	CPX	Metabolism;Metabolism;Metabolism	Global and overview maps;Global and overview maps;Metabolism of cofactors and vitamins	K00228;K00228;K00228	PREDICTED: oxygen-dependent coproporphyrinogen-III oxidase, chloroplastic, partial [Oryza brachyantha]	ko01100//Metabolic pathways;ko01110//Biosynthesis of secondary metabolites;ko00860//Porphyrin and chlorophyll metabolism	-	GO:0003824//catalytic activity	GO:0006778//porphyrin-containing compound metabolic process;GO:0044710//single-organism metabolic process
Unigene0014719	989	569	600	941	674	1562	1757	1597	1521	1647	37.91	24.12	26.67	31.99	23.14	63.88	60.47	54.98	54.37	59.77	28.766	58.694	1.02885	1.63e-06	2e-05	Os01g0622300	Metabolism;Metabolism;Metabolism	Global and overview maps;Global and overview maps;Metabolism of cofactors and vitamins	K01599;K01599;K01599	PREDICTED: uroporphyrinogen decarboxylase 1, chloroplastic [Setaria italica]	ko01100//Metabolic pathways;ko01110//Biosynthesis of secondary metabolites;ko00860//Porphyrin and chlorophyll metabolism	-	-	GO:0006778//porphyrin-containing compound metabolic process
Unigene0008185	2505	2814	2575	4256	2986	1046	1202	1223	1184	982	114.49	142.2	136.44	172.49	122.22	51	49.32	50.2	50.46	42.49	137.568	48.694	-1.49833	4.07e-22	4.79e-20	PPOX1	Metabolism;Metabolism;Metabolism	Global and overview maps;Global and overview maps;Metabolism of cofactors and vitamins	K00231;K00231;K00231	protoporphyrinogen IX oxidase1 [Zea mays]	ko01100//Metabolic pathways;ko01110//Biosynthesis of secondary metabolites;ko00860//Porphyrin and chlorophyll metabolism	-	GO:0003824//catalytic activity	GO:0006778//porphyrin-containing compound metabolic process;GO:0044710//single-organism metabolic process
Unigene0008183	870	867	897	836	1200	362	435	495	353	293	13.89	15.3	16.6	11.83	17.15	6.16	6.23	7.1	5.25	4.43	14.954	5.834	-1.35797	5.36e-29	1.08e-26	PPOX1	Metabolism;Metabolism;Metabolism	Global and overview maps;Global and overview maps;Metabolism of cofactors and vitamins	K00231;K00231;K00231	protoporphyrinogen IX oxidase1 [Zea mays]	ko01100//Metabolic pathways;ko01110//Biosynthesis of secondary metabolites;ko00860//Porphyrin and chlorophyll metabolism	-	GO:0003824//catalytic activity	GO:0006778//porphyrin-containing compound metabolic process;GO:0044710//single-organism metabolic process
Unigene0006278	198	107	142	151	150	449	597	463	436	419	8.6	5.14	7.15	5.81	5.83	20.8	23.27	18.06	17.65	17.22	6.506	19.4	1.57621	4e-17	2.74e-15	CPX	Metabolism;Metabolism;Metabolism	Global and overview maps;Global and overview maps;Metabolism of cofactors and vitamins	K00228;K00228;K00228	PREDICTED: oxygen-dependent coproporphyrinogen-III oxidase, chloroplastic-like [Setaria italica]	ko01100//Metabolic pathways;ko01110//Biosynthesis of secondary metabolites;ko00860//Porphyrin and chlorophyll metabolism	-	GO:0003824//catalytic activity	GO:0006778//porphyrin-containing compound metabolic process;GO:0044710//single-organism metabolic process
Unigene0005124	57728	7004	14801	71856	8567	163	781	2114	6162	180	2160.22	289.8	642.13	2384.5	287.1	6.51	26.24	71.04	215.01	6.38	1152.75	65.036	-4.1477	4.02e-05	0.000344585	PORA	Metabolism;Metabolism;Metabolism	Global and overview maps;Global and overview maps;Metabolism of cofactors and vitamins	K00218;K00218;K00218	protochlorophyllide reductase 1 [Zea mays]	ko01100//Metabolic pathways;ko01110//Biosynthesis of secondary metabolites;ko00860//Porphyrin and chlorophyll metabolism	-	GO:0016628//oxidoreductase activity, acting on the CH-CH group of donors, NAD or NADP as acceptor	GO:0044710//single-organism metabolic process
Unigene0002222	4707	4973	4102	6258	5228	150	180	230	404	116	84.09	98.24	84.96	99.15	83.65	2.86	2.89	3.69	6.73	1.96	90.018	3.626	-4.63376	1.96e-64	1.97e-61	Os10g0502400	Metabolism;Metabolism;Metabolism	Global and overview maps;Global and overview maps;Metabolism of cofactors and vitamins	K02492;K02492;K02492	PREDICTED: glutamyl-tRNA reductase, chloroplastic-like [Zea mays]	ko01100//Metabolic pathways;ko01110//Biosynthesis of secondary metabolites;ko00860//Porphyrin and chlorophyll metabolism	GO:0009536//plastid	GO:0000166//nucleotide binding;GO:0016620//oxidoreductase activity, acting on the aldehyde or oxo group of donors, NAD or NADP as acceptor	GO:0006779//porphyrin-containing compound biosynthetic process;GO:0044710//single-organism metabolic process
