# Supplementary material for: Transcriptome and Metabolome Analyses Reveal an Insight of Chlorophyll, Photosynthesis, Metal Ion and Phenylpropanoids Related Pathways in Sugarcane Ratoon Chlorosis
Source: Research Square preprint supplement (doi:10.21203/rs.3.rs-1194932/v1), 2021-12-28
Supplement: Supplementary file 2 [file d1bbab4d9f9f85a97e03001c.xls]

## Sheet: genes related to metal ion tran
id	Symbol	Control-1_fpkm	Control-2_fpkm	Control-3_fpkm	Control-4_fpkm	Control-5_fpkm	Chlorosis-1_fpkm	Chlorosis-2_fpkm	Chlorosis-3_fpkm	Chlorosis-4_fpkm	Chlorosis-5_fpkm	Control_mean	Chlorosis_mean	log2fc	pvalue	fdr	Pathway	GO Process
Unigene0000001	MRS2-B	2.64	3.08	2.55	3.48	3.04	1.28	1.18	1	0.96	0.78	2.958	1.04	-1.50804	1.55e-13	6.85e-12	-	GO:0044763//single-organism cellular process;GO:0070838//divalent metal ion transport
Unigene0002887	PSAO	1404.16	964.64	980.21	1543.62	1207.17	375.05	407.94	493.94	361.52	373.99	1219.96	402.488	-1.59982	4.1e-20	3.88e-18	ko00195//Photosynthesis	GO:0000097//sulfur amino acid biosynthetic process;GO:0006873//cellular ion homeostasis;GO:0006996//organelle organization;GO:0009765//photosynthesis, light harvesting;GO:0016072//rRNA metabolic process;GO:0030001//metal ion transport;GO:0031399//regulation of protein modification process;GO:0043623//cellular protein complex assembly
Unigene0002936	FER1	20.28	87.47	22.93	25.28	26.83	0.31	0.2	0.81	0.34	0.55	36.558	0.442	-6.37	1.24e-40	4.96e-38	-	GO:0000041//transition metal ion transport;GO:0006979//response to oxidative stress;GO:0044237//cellular metabolic process;GO:0044710//single-organism metabolic process;GO:0046916//cellular transition metal ion homeostasis;GO:0048827//phyllome development;GO:0090567//reproductive shoot system development
Unigene0003791	ACA10	87.98	18.89	37.14	52.65	25.53	98.42	181.24	135.83	227.78	100.41	44.438	148.736	1.74289	5.37e-05	0.000442689	-	GO:0006816//calcium ion transport
Unigene0008563	HAK1	13.28	9.58	9.57	12.83	8.8	22.63	75.07	25.3	56.51	48.39	10.812	45.58	2.07577	1.01e-08	2.03e-07	-	GO:0030001//metal ion transport;GO:0034220//ion transmembrane transport
Unigene0015052	--	5.57	1.12	1.93	2.57	1.17	0.15	0.91	1.56	1.42	0.68	2.472	0.944	-1.38882	0.00766007	0.0301391	-	GO:0000041//transition metal ion transport;GO:0001101//response to acid chemical;GO:0009267//cellular response to starvation;GO:0015698//inorganic anion transport;GO:0045491//xylan metabolic process
Unigene0017006	Os12g0562100	16.69	27.33	23.96	14.6	19.73	59.81	50.83	41.97	42.96	37.96	20.462	46.706	1.19066	1.69e-07	2.6e-06	-	GO:0006826//iron ion transport
Unigene0019302	--	6.84	6.19	6.25	9.01	7.42	2.43	0.93	0.37	1.16	0.78	7.142	1.134	-2.65491	5.36e-11	1.65e-09	-	GO:0006816//calcium ion transport;GO:0006829//zinc II ion transport;GO:0009416//response to light stimulus;GO:0015691//cadmium ion transport;GO:0042221//response to chemical;GO:0046916//cellular transition metal ion homeostasis;GO:0072507//divalent inorganic cation homeostasis
Unigene0020838	Os05g0428700	8.93	10.96	10.08	10.6	11.24	4.4	4.02	4.64	5.27	7.11	10.362	5.088	-1.02613	1.83e-08	3.47e-07	-	GO:0030001//metal ion transport;GO:0032958//inositol phosphate biosynthetic process;GO:0034220//ion transmembrane transport;GO:0065008//regulation of biological quality
Unigene0021224	PSAL	6671.32	6138	5648.62	7950.04	5915.65	2088.75	1955.13	2457.14	2033.9	2151.35	6464.73	2137.25	-1.59683	3.71e-26	6.36e-24	ko01100//Metabolic pathways;ko00195//Photosynthesis	GO:0006091//generation of precursor metabolites and energy;GO:0006873//cellular ion homeostasis;GO:0006996//organelle organization;GO:0030001//metal ion transport;GO:0043623//cellular protein complex assembly
Unigene0021451	PSAK	1444.81	1011.51	985.11	1328.32	1053.18	446.82	375.08	490.14	348.22	428.67	1164.59	417.786	-1.47898	1.17e-19	1.05e-17	ko01100//Metabolic pathways;ko00195//Photosynthesis	GO:0000097//sulfur amino acid biosynthetic process;GO:0006873//cellular ion homeostasis;GO:0030001//metal ion transport
Unigene0026714	KAB1	0	0	0	0	0	0.75	1.19	0.48	0.49	0.92	0	0.766	9.5812	1.28e-06	1.61e-05	-	GO:0030001//metal ion transport
Unigene0028976	--	32.1	24.99	38.23	21.3	29.45	12.96	13	13.49	10.22	9.73	29.214	11.88	-1.29813	1.97e-20	1.93e-18	-	GO:0006816//calcium ion transport;GO:0044763//single-organism cellular process
Unigene0029675	FER1	74.43	163.76	78.23	67.62	83.86	0.32	0	1.22	0.56	0.57	93.58	0.534	-7.45322	9.82e-57	8.28e-54	-	GO:0000041//transition metal ion transport;GO:0006979//response to oxidative stress;GO:0044237//cellular metabolic process;GO:0044710//single-organism metabolic process;GO:0046916//cellular transition metal ion homeostasis;GO:0048827//phyllome development;GO:0090567//reproductive shoot system development
Unigene0035283	IRT2	0	0	0.05	0.06	0.02	29.48	20.59	40.51	18.37	33.71	0.026	28.532	10.0999	7.55e-53	5.36e-50	-	GO:0030001//metal ion transport;GO:0044763//single-organism cellular process
Unigene0035695	ZIP8	9.11	5.85	6.97	6.37	5.42	20.43	15.52	14.97	12.53	11	6.744	14.89	1.14267	1.52e-06	1.87e-05	-	GO:0006829//zinc II ion transport;GO:0044763//single-organism cellular process
Unigene0040569	NHX2	22.74	28.58	30.01	23.78	29.04	36.62	39.05	72.1	87.79	157.47	26.83	78.606	1.55079	0.000108776	0.000816651	-	GO:0006814//sodium ion transport;GO:0006970//response to osmotic stress;GO:0015992//proton transport;GO:0044763//single-organism cellular process;GO:0055065//metal ion homeostasis;GO:0055067//monovalent inorganic cation homeostasis
Unigene0050451	HAK27	4.6	10.34	10.25	4.25	10.55	39.33	58.45	31.16	24.69	25.41	7.998	35.808	2.16257	2.04e-10	5.58e-09	-	GO:0030001//metal ion transport;GO:0034220//ion transmembrane transport
Unigene0052245	PNSB5	118.09	52.25	74.62	86.94	53.44	193.25	187.75	164.2	156.7	177.44	77.068	175.868	1.19029	1.48e-05	0.000142486	-	GO:0006090//pyruvate metabolic process;GO:0006873//cellular ion homeostasis;GO:0009668//plastid membrane organization;GO:0030001//metal ion transport
Unigene0056614	DTX42	1.55	1.65	2.26	0.97	1.79	0.11	0.16	0.2	0.43	0.41	1.644	0.262	-2.64957	3.01e-13	1.28e-11	-	GO:0000041//transition metal ion transport;GO:0001101//response to acid chemical;GO:0006842//tricarboxylic acid transport;GO:0009267//cellular response to starvation;GO:0015698//inorganic anion transport;GO:0015893//drug transport;GO:0045491//xylan metabolic process;GO:0046916//cellular transition metal ion homeostasis
Unigene0064621	HMA1	24.47	41.47	37.81	29.28	34.07	21.32	9.43	9.71	10.35	8.63	33.42	11.888	-1.49121	3.97e-10	1.03e-08	-	GO:0006816//calcium ion transport;GO:0006829//zinc II ion transport;GO:0009416//response to light stimulus;GO:0015691//cadmium ion transport;GO:0042221//response to chemical;GO:0046916//cellular transition metal ion homeostasis;GO:0072507//divalent inorganic cation homeostasis
Unigene0066668	PIP1-6	0.13	0	0.15	0.23	0.47	1.41	0.83	0.71	0.74	1.63	0.196	1.064	2.44057	0.00386419	0.0171857	-	GO:0000041//transition metal ion transport;GO:0009267//cellular response to starvation;GO:0042044//fluid transport
Unigene0069660	HAK7	13.35	6.47	8.07	11.02	7.69	27.15	47.78	29.06	49.16	48.33	9.32	40.296	2.11223	1.48e-12	5.73e-11	-	GO:0030001//metal ion transport;GO:0034220//ion transmembrane transport
Unigene0074024	Os03g0267300	366.84	228.66	249.67	333.31	218.29	83.74	108.47	143.67	119.04	146.13	279.354	120.21	-1.21654	7.33e-09	1.51e-07	ko01100//Metabolic pathways;ko01110//Biosynthesis of secondary metabolites;ko01200//Carbon metabolism;ko00010//Glycolysis / Gluconeogenesis;ko00710//Carbon fixation in photosynthetic organisms;ko00030//Pentose phosphate pathway;ko00051//Fructose and mannose metabolism	GO:0005982//starch metabolic process;GO:0005984//disaccharide metabolic process;GO:0006739//NADP metabolic process;GO:0006779//porphyrin-containing compound biosynthetic process;GO:0006873//cellular ion homeostasis;GO:0009617//response to bacterium;GO:0009639//response to red or far red light;GO:0009658//chloroplast organization;GO:0009668//plastid membrane organization;GO:0009767//photosynthetic…
Unigene0083098	HCC1	2.54	2.04	2.01	2.45	2.27	5.7	5.52	5.7	5.88	5.13	2.262	5.586	1.30422	2.59e-12	9.69e-11	-	GO:0000041//transition metal ion transport;GO:0006089//lactate metabolic process;GO:0006605//protein targeting;GO:0008535//respiratory chain complex IV assembly;GO:0044767//single-organism developmental process;GO:0046916//cellular transition metal ion homeostasis
Unigene0084312	TDT	12.33	24.87	25.99	12.42	13.42	128.49	167	64.99	75.84	87.95	17.806	104.854	2.55795	5.53e-14	2.6e-12	-	GO:0030001//metal ion transport;GO:0044763//single-organism cellular process
Unigene0084422	ZIP7	38.59	68.92	55.86	55.05	48.15	27.64	13.49	17.04	10.38	9.61	53.314	15.632	-1.77001	1.87e-11	6.17e-10	-	GO:0006829//zinc II ion transport;GO:0044763//single-organism cellular process
Unigene0084970	Os02g0245800	1.7	3.05	3.62	1.26	4.45	7.27	4.65	5.02	7.34	5.13	2.816	5.882	1.06266	0.001684	0.00855792	-	GO:0030001//metal ion transport;GO:0034220//ion transmembrane transport
Unigene0086119	KEA3	24.42	30.07	30.45	22.01	31.05	82.56	72.54	63.43	77.82	57.47	27.6	70.764	1.35835	1.07e-19	9.72e-18	-	GO:0015992//proton transport;GO:0030001//metal ion transport;GO:0044763//single-organism cellular process
Unigene0087639	HAK16	4.48	6.51	6.04	5.6	6.12	11.02	23.68	10.2	14.77	8.55	5.75	13.644	1.24663	6.48e-05	0.000521177	-	GO:0030001//metal ion transport;GO:0034220//ion transmembrane transport
Unigene0087771	HMA2	17.78	15.86	19.5	16.15	20.83	7.59	7.5	9.82	7.99	7.79	18.024	8.138	-1.14717	9.71e-34	2.7e-31	-	GO:0030001//metal ion transport
